# Supplementary material for: A Water-Stable 2-Fold Interpenetrating cds Net as a Bifunctional Fluorescence-Responsive Sensor for Selective Detection of Cr(III) and Cr(VI) Ions
Source: MDPI journal article supplement (doi:10.3390/nano12010158), 2022-01-03
Supplement: s1 [file s1]

## Supporting Information

### **A Water-Stable 2-Fold Interpenetrating cds Net as a Bifunctional Fluorescence-Responsive Sensor for Selective Detection of Cr(III) and Cr(VI) Ions**

**Meng-Jung Tsai, Kuo-Shun Liao, and Jing-Yun Wu\***

Department of Applied Chemistry, National Chi Nan University, Nantou 545, Taiwan. E-mail:

[jyunwu@ncnu.edu.tw](mailto:jyunwu@ncnu.edu.tw)

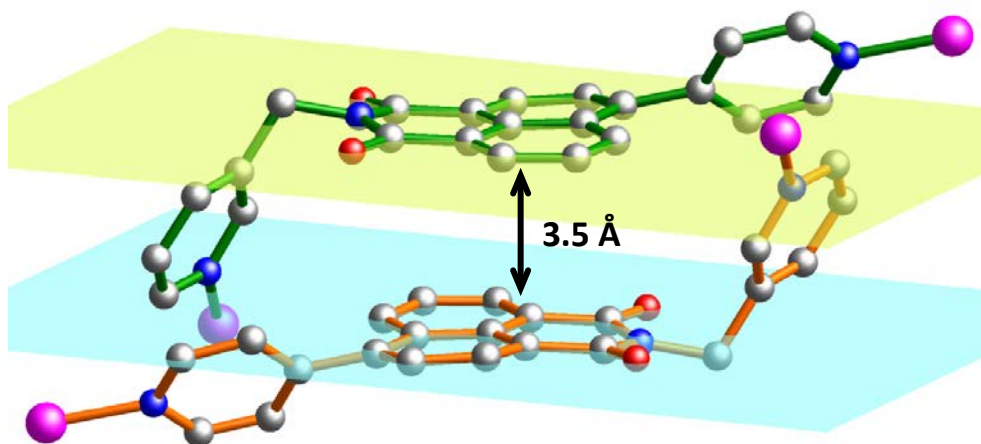

**Figure S1.** Plot of the inter-net  $\pi$ – $\pi$  interactions between two neighboring naphthalimide skeletons in the two independent identical **cds** frameworks in the crystal structure of **1**.

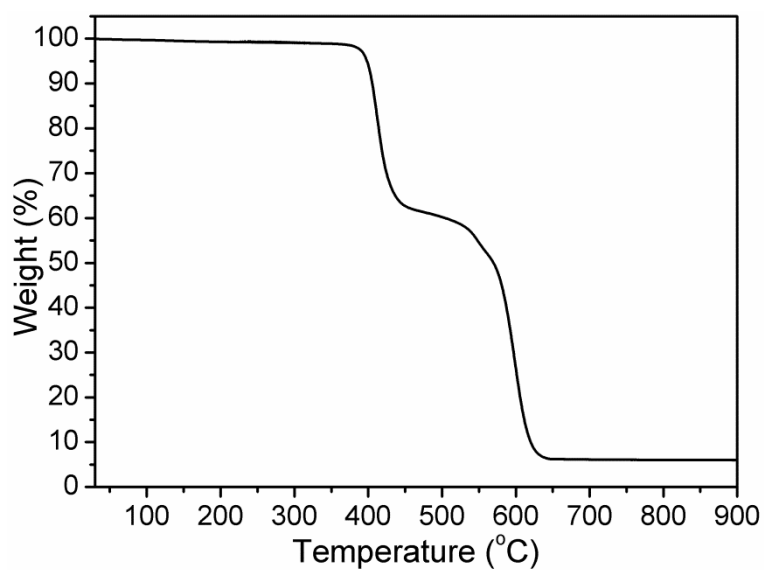

**Figure S2.** TG curve of **1**.

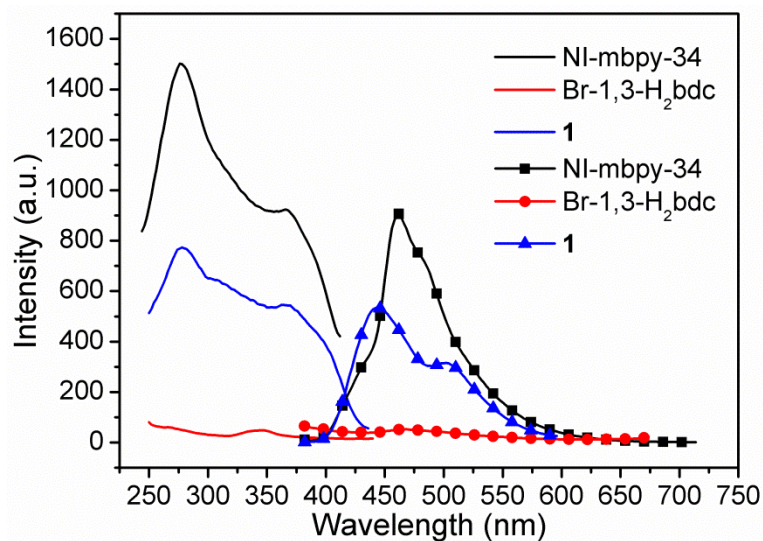

**Figure S3.** Solid-state excitation (solid lines) and emission spectra (solid lines with symbols) of NI-mbpy-34, Br-1,3-H<sub>2</sub>bdc, and **1** at room temperature.

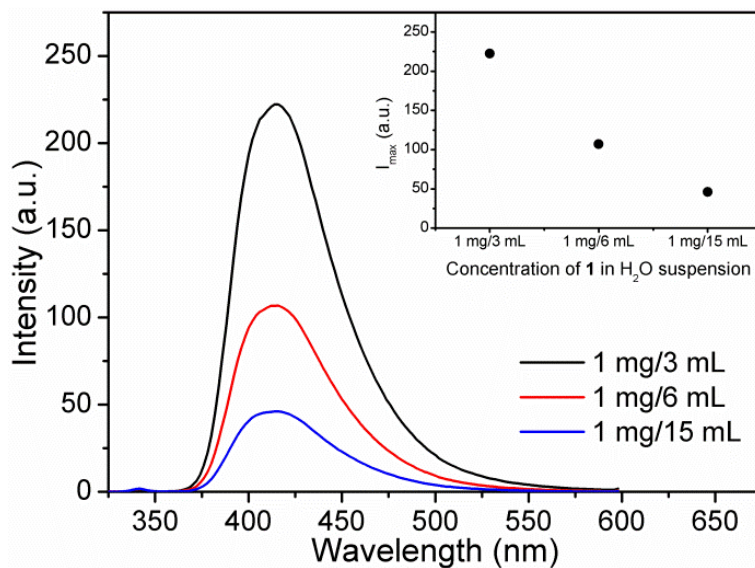

**Figure S4.** Fluorescence emission spectra of **1** in H<sub>2</sub>O suspensions of different concentrations at room temperature upon excitation at 306 nm. Inset: Fluorescence relative ratio responses of **1** in H<sub>2</sub>O suspensions of different concentrations.

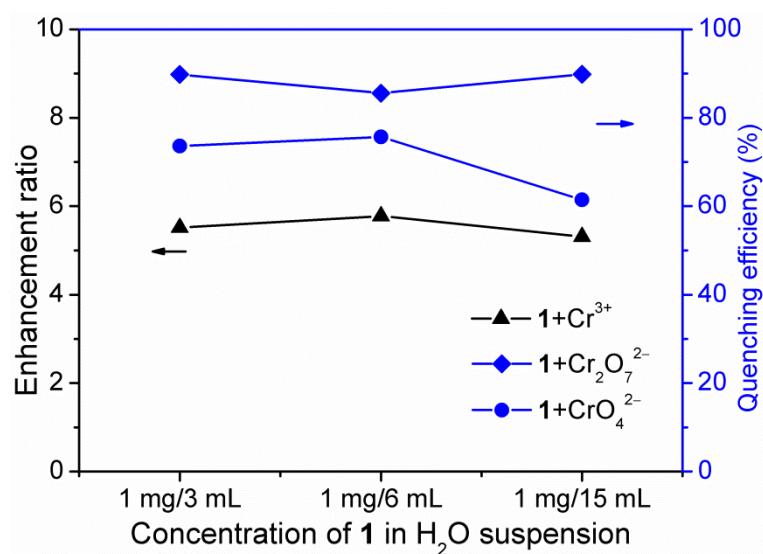

**Figure S5.** Effect of the concentration of **1** in H<sub>2</sub>O suspension on the fluorescence intensity responses upon addition of Cr<sup>3+</sup> ions (enhancement) and Cr(VI) anions (quenching) at 1.0 mM.

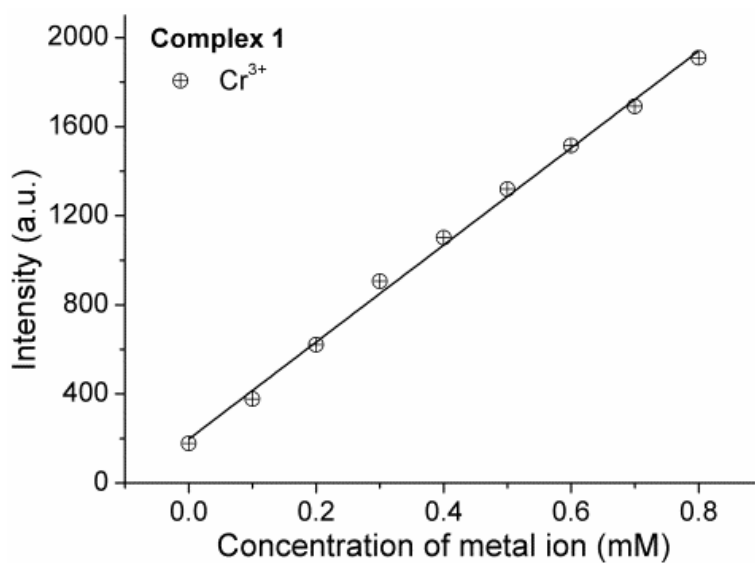

| Blank readings                           | Cr <sup>3+</sup> |
|------------------------------------------|------------------|
| #1                                       | 177.8            |
| #2                                       | 176.9            |
| #3                                       | 174.2            |
| #4                                       | 174.5            |
| #5                                       | 172.1            |
| Standard deviation ( $\sigma$ )          | 2.27             |
| Slope ( $k$ )                            | 2178.4           |
| $R^2$                                    | 0.99631          |
| LOD ( $3\sigma/k$ ), $\mu\text{M}$ (ppb) | 3.13 (162.9)     |

**Figure S6.** Linear region of fluorescence intensity for the H<sub>2</sub>O suspensions of complex **1** upon incremental addition of Cr<sup>3+</sup> ions. The following table lists the relevant parameters of LOD for the H<sub>2</sub>O suspensions of complex **1** toward Cr<sup>3+</sup> ions. Conditions:  $\lambda_{\text{em}} = 414 \text{ nm}$  ( $\lambda_{\text{ex}} = 280 \text{ nm}$ ).

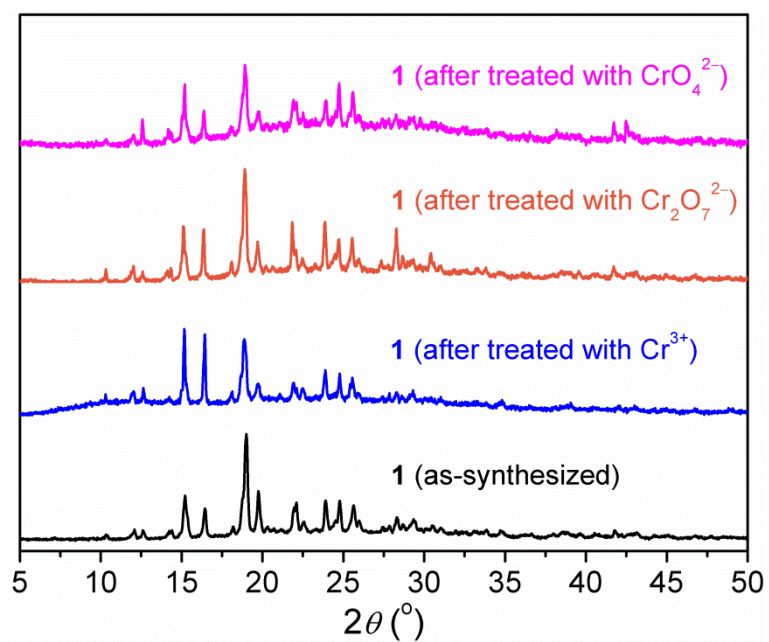

**Figure S7.** XRPD patterns of **1** before and after immersing in  $\text{Cr}^{3+}$ ,  $\text{Cr}_2\text{O}_7^{2-}$ , and  $\text{CrO}_4^{2-}$  aqueous solutions for 24 h.

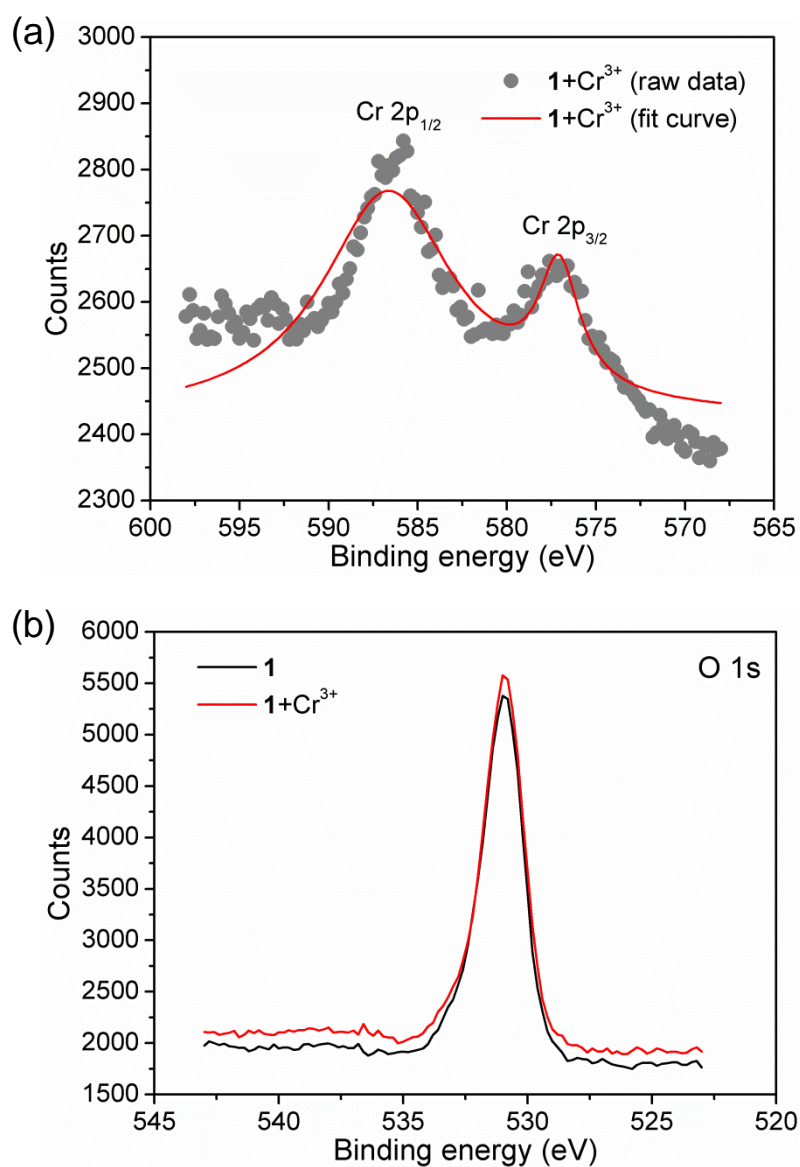

**Figure S8.** (a) XPS high resolution spectra of Cr 2p for **1** after sensing  $\text{Cr}^{3+}$ . (b) XPS high resolution spectra of O 1s for **1** before and after sensing  $\text{Cr}^{3+}$ .

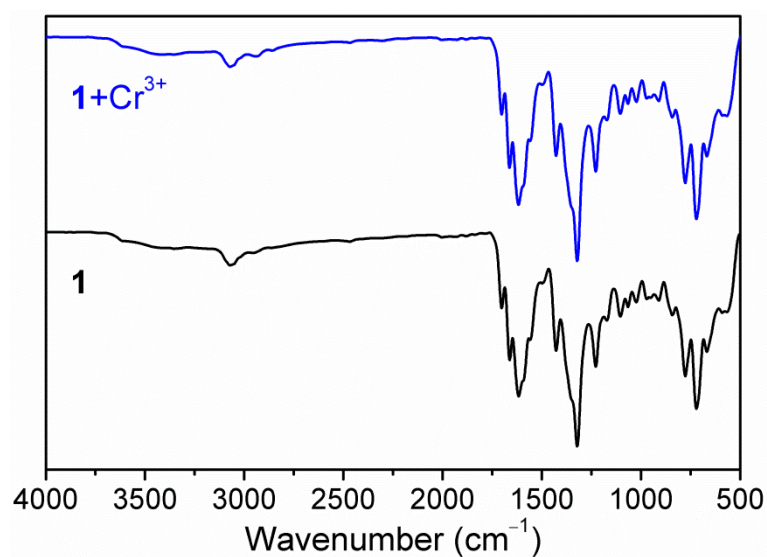

**Figure S9.** IR spectra of **1** before and after immersing in Cr<sup>3+</sup> aqueous solution for 24 h.

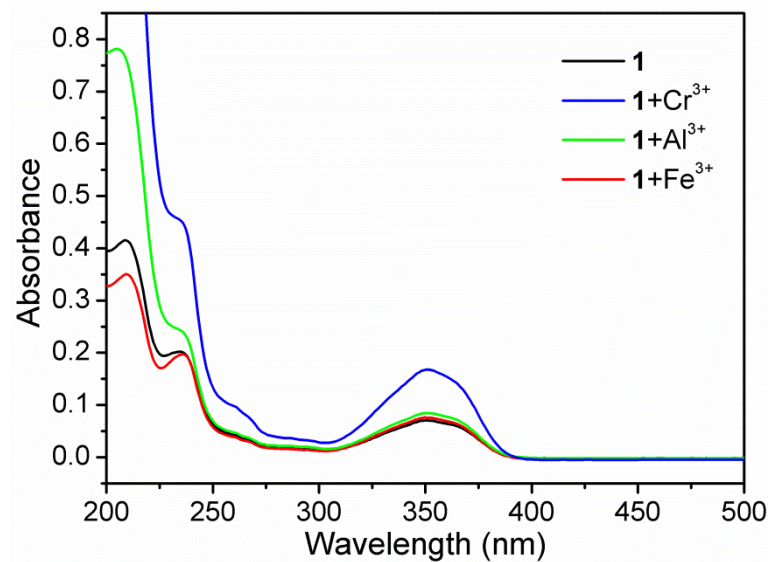

**Figure S10.** UV-vis spectra of **1** before and after immersing in Cr<sup>3+</sup>, Al<sup>3+</sup>, Fe<sup>3+</sup> aqueous solutions for 24 h.



### *Influence of $\text{Cr}^{3+}$ detection in the coexistence of $\text{Cr(VI)}$ anions and vice versa*

The influence of  $\text{Cr}^{3+}$  detection in the coexistence of  $\text{Cr(VI)}$  anions and vice versa using the well-prepared  $\text{H}_2\text{O}$  suspension of **1** (1 mg/3 mL) as sensor was studied. Interference experiments were carried out in two different ways: (1) adding the interfering ions firstly and then adding the analyte ions; (2) adding the mixture of analyte and interfering ions. The concentrations of analyte and interfering ions both are 1.0 mM. Before and after addition of interfering/analyte ions, the photoluminescence spectra were obtained at an excitation wavelength of 306 nm in each step. As shown in Figure S11, experimental results clearly indicate that  $\text{Cr(VI)}$  anions strongly interfere with  $\text{Cr}^{3+}$  detection while  $\text{Cr}^{3+}$  ions cause no interference on the detection of  $\text{Cr(VI)}$  anions ( $\text{Cr}_2\text{O}_7^{2-}$ ,  $\text{CrO}_4^{2-}$ ).

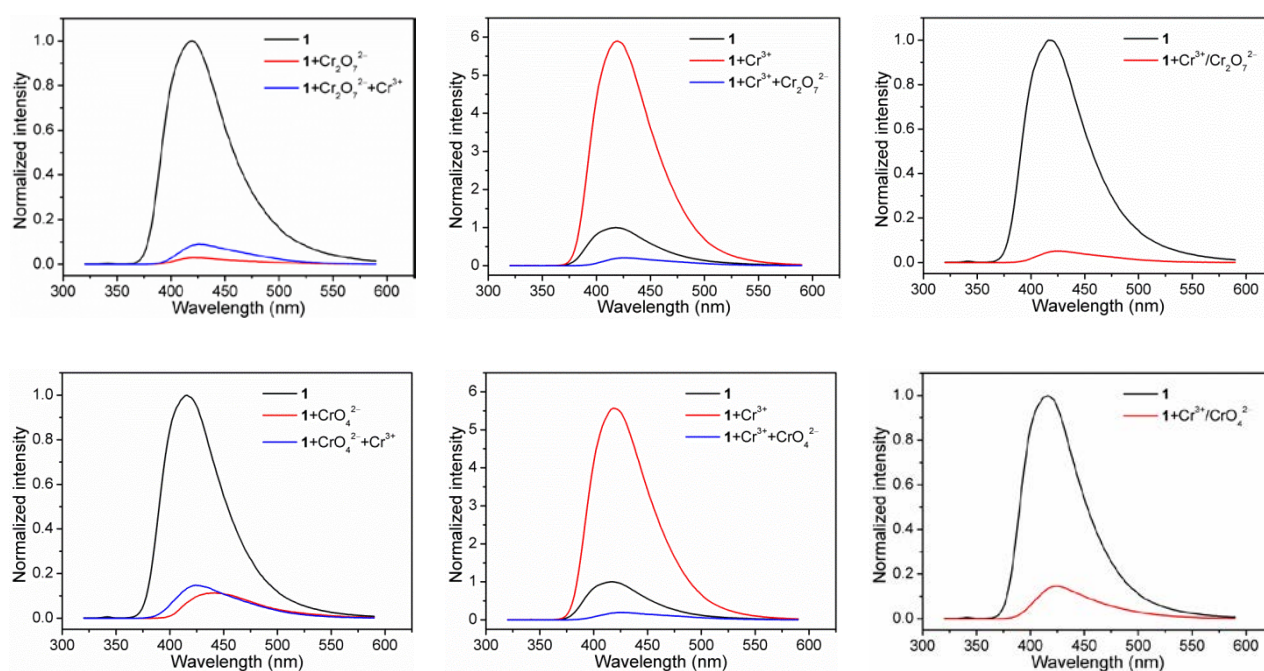

**Figure S11.** Fluorescence emission spectra of **1** in  $\text{H}_2\text{O}$  suspension (1 mg/3 mL) before and after addition of interfering/analyte ions at room temperature upon excitation at 306 nm.

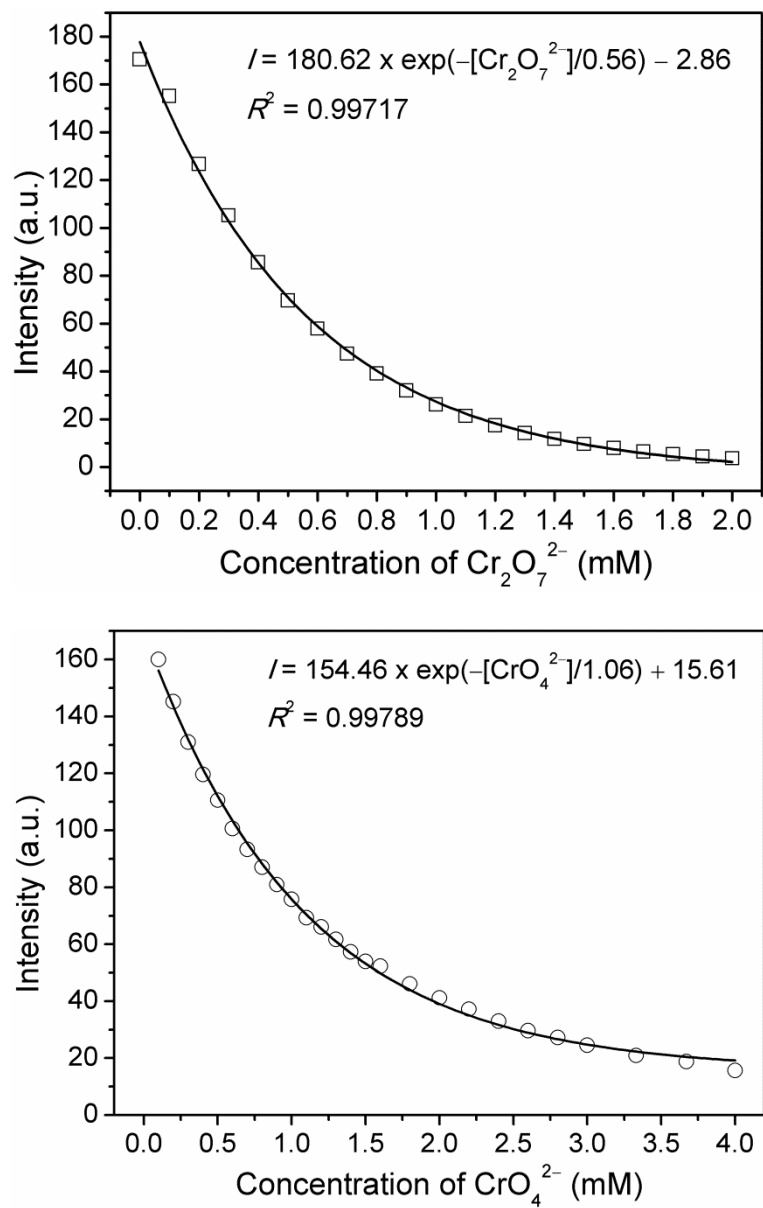

**Figure S12.** Fluorescence intensity traces ( $\lambda_{\text{em}} = 438 \text{ nm}$ ) for the H<sub>2</sub>O suspensions of **1** upon incremental addition of Cr<sub>2</sub>O<sub>7</sub><sup>2-</sup> and CrO<sub>4</sub><sup>2-</sup> ions when excited at 306 nm, following the first-order exponential decay.

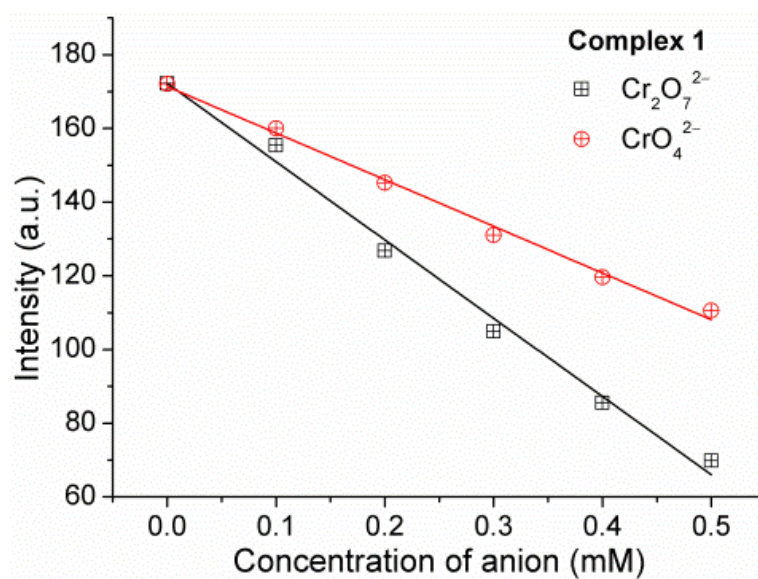

| Blank readings                           | Cr <sub>2</sub> O <sub>7</sub> <sup>2-</sup> | CrO <sub>4</sub> <sup>2-</sup> |
|------------------------------------------|----------------------------------------------|--------------------------------|
| #1                                       | 170.4                                        | 172.1                          |
| #2                                       | 169.8                                        | 171.2                          |
| #3                                       | 176.1                                        | 170.0                          |
| #4                                       | 175.3                                        | 172.3                          |
| #5                                       | 175.6                                        | 172.7                          |
| Standard deviation ( $\sigma$ )          | 3.07                                         | 1.08                           |
| Slope (m)                                | 212.4                                        | 126.5                          |
| $R^2$                                    | 0.99081                                      | 0.99277                        |
| LOD ( $3\sigma/m$ ), $\mu\text{M}$ (ppm) | 43.36 (9.36)                                 | 25.57 (2.97)                   |

**Figure S13.** Linear region of fluorescence intensity ( $\lambda_{\text{em}} = 438 \text{ nm}$ ) for the  $\text{H}_2\text{O}$  suspensions of **1** upon incremental addition of  $\text{Cr}_2\text{O}_7^{2-}$  and  $\text{CrO}_4^{2-}$  ions when excited at 306 nm. The following table lists the relevant parameters of LOD for the  $\text{H}_2\text{O}$  suspensions of **1** toward  $\text{Cr}_2\text{O}_7^{2-}$  and  $\text{CrO}_4^{2-}$  ions.

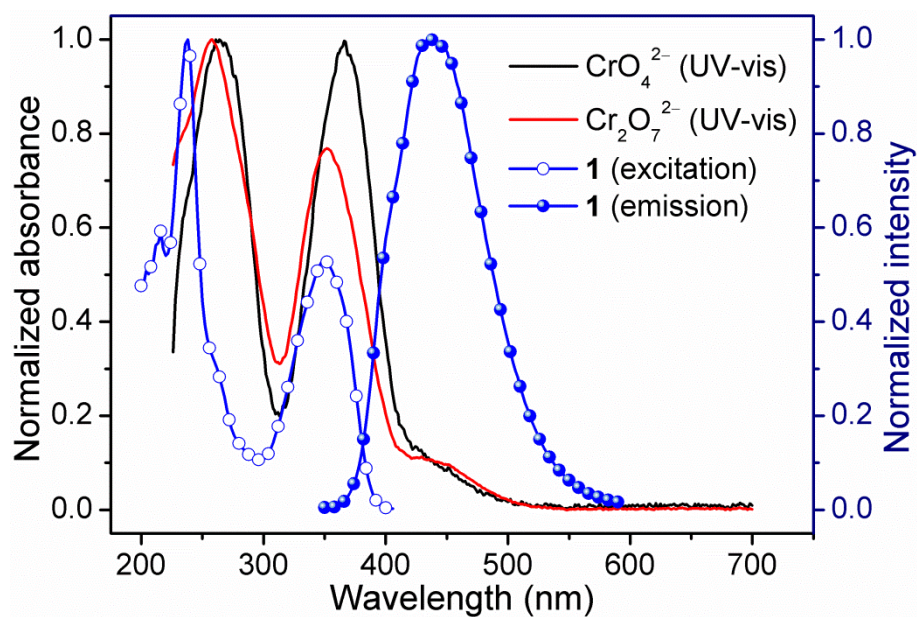

**Figure S14.** Spectral overlap between the normalized emission spectra of **1** in H<sub>2</sub>O suspensions and the normalized absorption spectra of Cr<sub>2</sub>O<sub>7</sub><sup>2-</sup> and CrO<sub>4</sub><sup>2-</sup> in aqueous solutions.
